# Supplementary material for: Quantitative Microvascular Change Analysis Using a Semi-Automated Software in Macula-off Rhegmatogenous Retinal Detachment Assessed by Swept-Source Optical Coherence Tomography Angiography
Source: MDPI journal article supplement (doi:10.3390/jcm13102835), 2024-05-11
Supplement: s1 [file s1]

**Table S1.** Spearman rank correlation coefficient (rho) of the optical coherence tomography angiography (semi-automated and OCTA software) parameters of RRD eyes and their fellow eyes at month 6.

|             | Semi-automated software |                        |
|-------------|-------------------------|------------------------|
|             | SCP                     | DCP                    |
| VDI         |                         |                        |
| Rho (95%CI) | 0.185 (-0.118 to 0.457) | 0.337 (0.045 to 0.576) |
| p           | 0.2284                  | 0.0253                 |
| VAD         |                         |                        |
| Rho (95%CI) | 0.463 (0.192 to 0.668)  | 0.410 (0.129 to 0.630) |
| p           | 0.0016                  | 0.0057                 |
| VSD         |                         |                        |
| Rho (95%CI) | 0.202 (-0.099 to 0.472) | 0.404 (0.122 to 0.626) |
| p           | 0.1848                  | 0.0066                 |
|             | OCTA built-in software  |                        |
|             | SCP                     | DCP                    |
| Foveal      |                         |                        |
| Rho (95%CI) | 0.457 (0.186 to 0.664)  | 0.597 (0.365 to 0.759) |
| p           | 0.0018                  | <0.0001                |
| Parafoveal  |                         |                        |
| Rho (95%CI) | 0.161 (-0.143 to 0.437) | 0.430 (0.153 to 0.645) |
| p           | 0.2970                  | 0.0036                 |
| Whole       |                         |                        |
| Rho (95%CI) | 0.024 (-0.275 to 0.319) | 0.412 (0.131 to 0.632) |
| p           | 0.8773                  | 0.0054                 |
| FAZ         |                         |                        |
| Rho (95%CI) | 0.917 (0.852 to 0.954)  |                        |
| p           | <0.0001                 |                        |
| CMT         |                         |                        |
| Rho (95%CI) | 0.520 (0.264 to 0.708)  |                        |
| p           | 0.0003                  |                        |

VDI: Vessel diameter index; VAD: Vessel area density; VSD: Vessel skeleton density; SCP: Superficial capillary plexus; DCP: Deep capillary plexus; FAZ: Foveal avascular zone; CMT: Central macular thickness.

**Table S2.** A comparison of the preoperative\* optical coherence tomography angiography (OCTA) built-in software parameters between the eyes that achieved a best corrected visual acuity (BCVA) gain  $\geq 0.3$  and those that did not. P values were calculated with the Mann-Whitney U test.

|                      | BCVA gain <0.3 | BCVA gain $\geq 0.3$ | Difference (95% CI)** | p      |
|----------------------|----------------|----------------------|-----------------------|--------|
| FSCP, mean $\pm$ SD  | 20.4 $\pm$ 3.6 | 21.3 $\pm$ 5.1       | -1.1 (-4.0 to 1.8)    | 0.4102 |
| PFSCP, mean $\pm$ SD | 47.9 $\pm$ 1.3 | 48.5 $\pm$ 2.3       | -0.3 (-1.4 to 0.7)    | 0.4888 |

|                |            |            |                      |        |
|----------------|------------|------------|----------------------|--------|
| WSCP, mean±SD  | 42.4±1.1   | 43.1±2.1   | -0.5 (-1.4 to 0.5)   | 0.3397 |
| FDCP, mean±SD  | 19.8±3.3   | 21.4±9.1   | -0.6 (-4.0 to 3.0)   | 0.6078 |
| PFDCP, mean±SD | 56.0±3.0   | 57.2±2.8   | -1.2 (-3.2 to 0.6)   | 0.2827 |
| WDCP, mean±SD  | 48.8±2.2   | 50.1±2.6   | -1.0 (-2.6 to 0.4)   | 0.1736 |
| FAZ, mean±SD   | 0.26±0.10  | 0.23±0.10  | 0.04 (-0.04 to 0.10) | 0.2935 |
| CMT, mean±SD   | 282.8±28.7 | 291.7±22.9 | -6.0 (-20.0 to -6.0) | 0.3579 |

\* Preoperative parameters of fellow eyes have been considered. \*\*Hodges-Lehmann median difference. BCVA: Best corrected visual acuity; SD: Standard deviation; 95%CI: 95% confidence interval; FSCP: Foveal superficial capillary plexus; PFSCP: Parafoveal superficial capillary plexus; WSCP: whole superficial capillary plexus; FDCP: Foveal deep capillary plexus; PFDCP: Parafoveal deep capillary plexus; WDCP: whole deep capillary plexus; FAZ: Foveal avascular zone; CMT: Central macular thickness.

**Table S3.** Percentage of eyes that experienced different changes in best corrected visual acuity (BCVA) regardless of the preoperative BCVA.

|                        | RRD eyes  |
|------------------------|-----------|
| BCVA loss ≥ 0.3, n (%) | 4 (9.1)   |
| BCVA loss ≥ 0.2, n (%) | 4 (9.1)   |
| BCVA loss ≥ 0.1, n (%) | 6 (13.6)  |
| BCVA no changed, n (%) | 10 (22.7) |
| BCVA gain ≥ 0.1, n (%) | 28 (63.6) |
| BCVA gain ≥ 0.2, n (%) | 27 (61.4) |
| BCVA gain ≥ 0.3, n (%) | 25 (56.8) |

BCVA: Best corrected visual acuity.

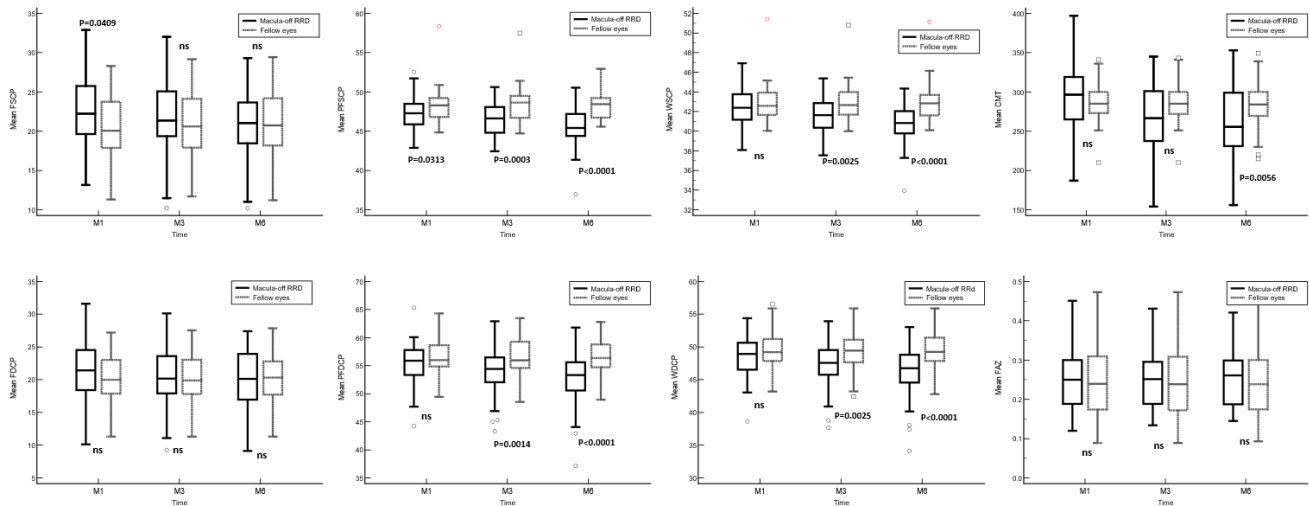

**Figure S1.** A comparison of the optical coherence tomography angiography (OCTA) built-in software parameters variables, central macular thickness (CMT) and foveal avascular zone (FAZ) in the superficial and deep capillary plexuses between the eyes with macula off rhegmatogenous retinal detachment (RRD) and their fellow eyes. Between group comparisons were calculated with the Mann-Whitney U test. FSCP: Foveal superficial capillary plexus; PFSCP: Parafoveal superficial capillary plexus; WSCP: whole superficial capillary plexus; FDCP: Foveal deep capillary plexus; PFDCP: Parafoveal deep capillary plexus; WDCP: whole deep capillary plexus; FAZ: Foveal avascular zone; CMT: Central macular thickness.
